# Supplementary figures and images for: Coding strategies in the otolith system differ for translational head motion vs. static orientation relative to gravity
Source: eLife journal article supplement (doi:10.7554/elife.45573), 2019-06-14

A.

Example irregular afferent

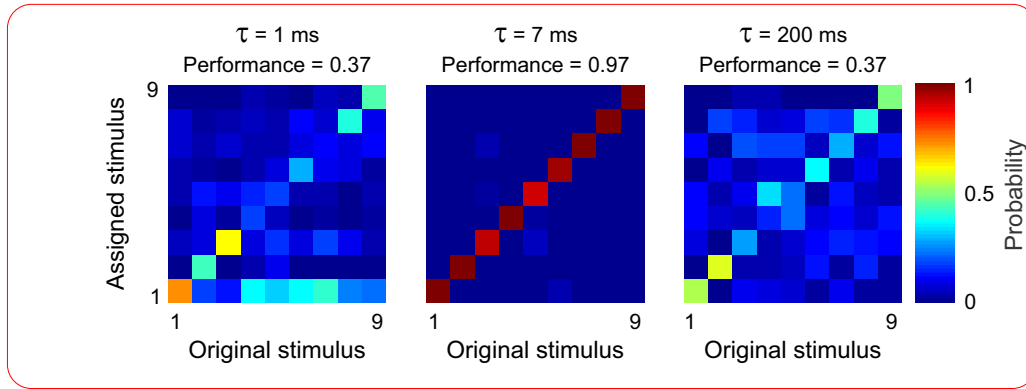

B.

Example regular afferent

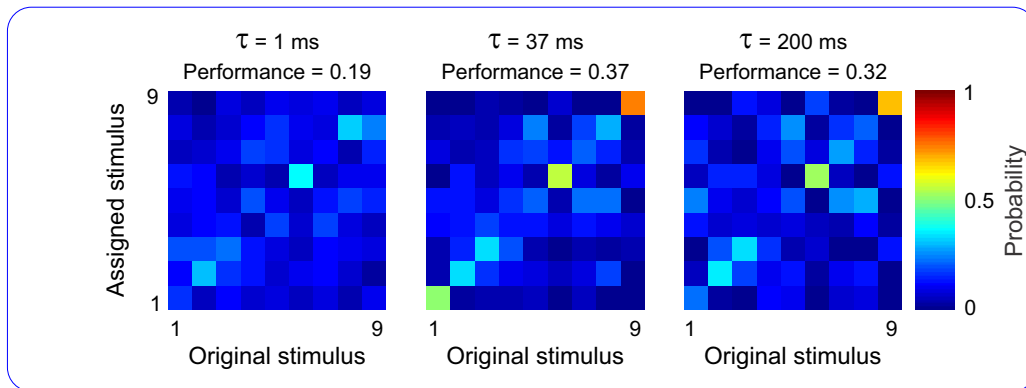

Supplement: supp [file elife-45573-supp-v1.zip]

**A.**

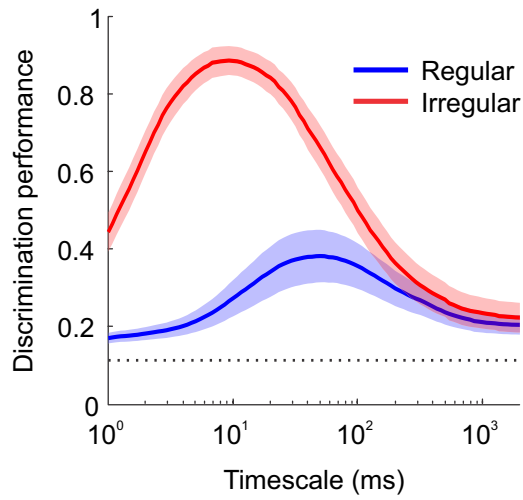

**B.**

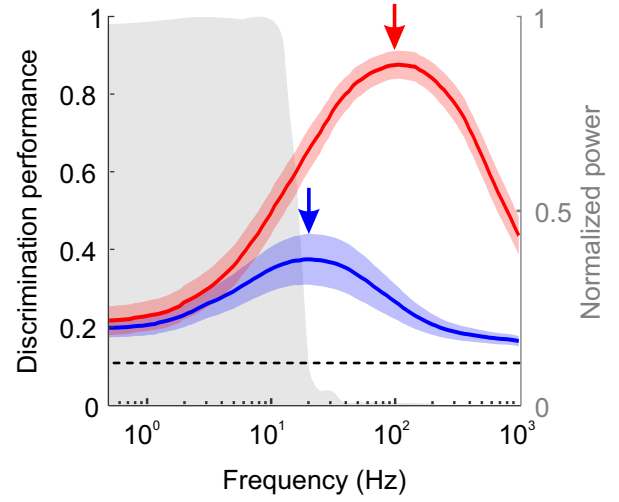

**C.**

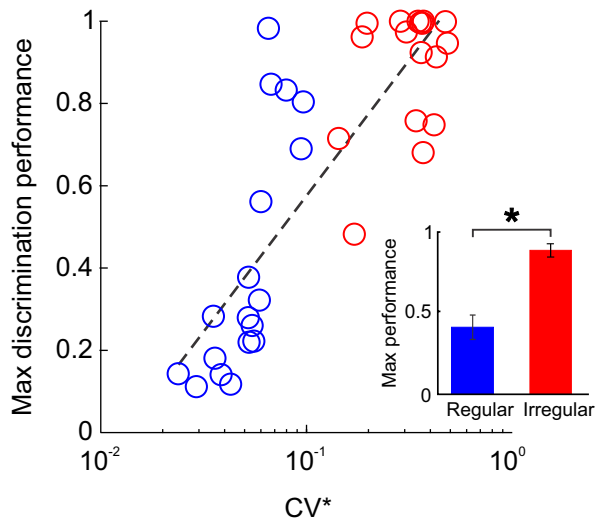

**D.**

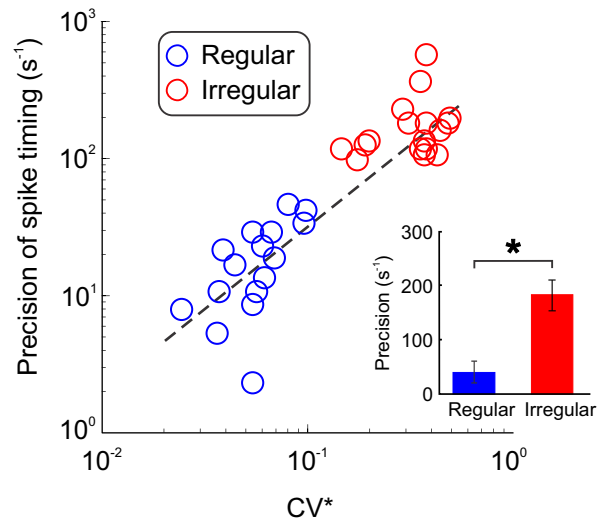

Supplement: supp [file elife-45573-supp-v1.zip]

**A.**

Example irregular model

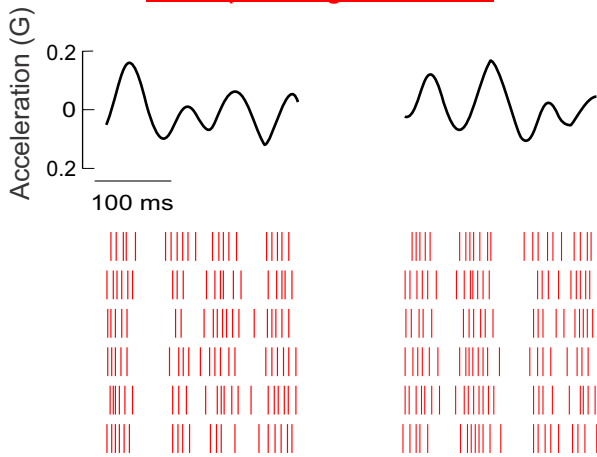

**B.**

Example regular model

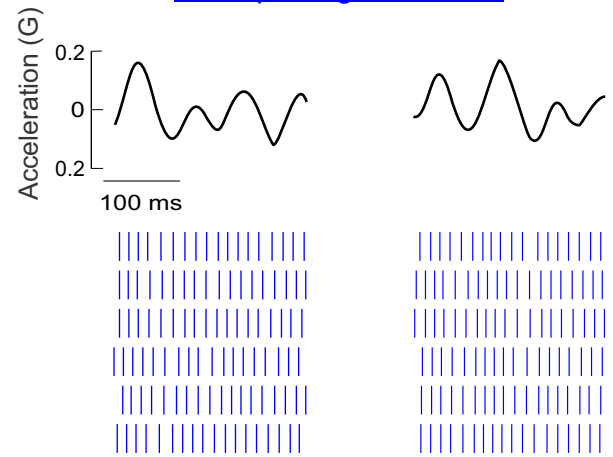

**C.**

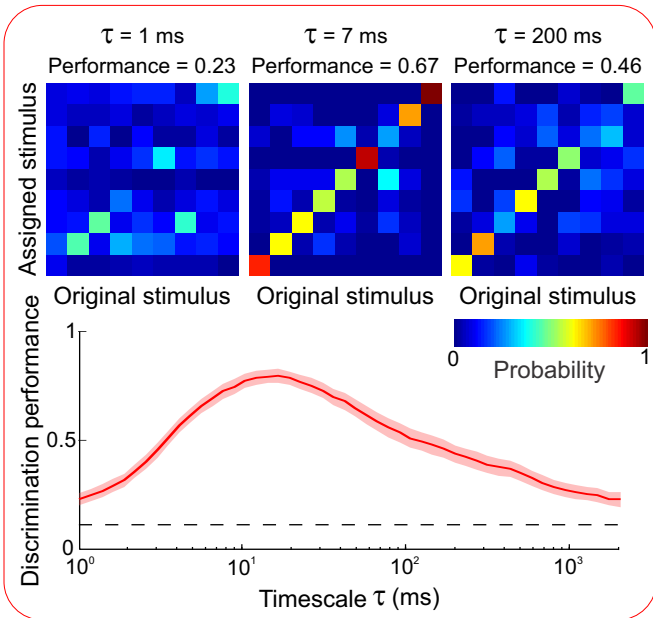

**D.**

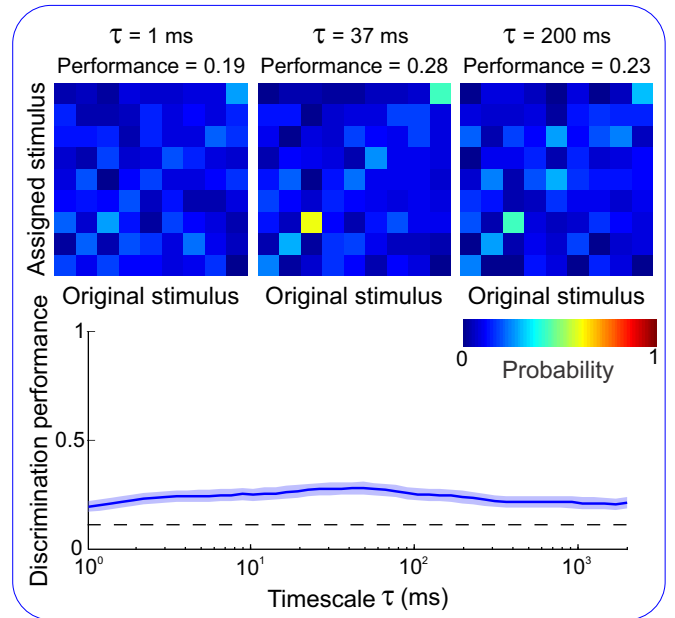

Supplement: supp [file elife-45573-supp-v1.zip]
